47 MammaPrint<sup>3</sup>, Oncotype DX<sup>4,5</sup> and PAM50<sup>6</sup> can classify Breast Cancer (BC) tumour types  
48 and risk of relapse<sup>7</sup> but with limited clinical utility<sup>7,8</sup>. Genomic and transcriptional  
49 biomarkers of drug sensitivity are available only for a restricted number of drugs<sup>1,2,9</sup>. As a  
50 consequence, BC patient stratification is still mainly driven by receptor status and  
51 histological grading and subtyping<sup>7</sup>, with about twenty percent<sup>10</sup> of patients for which  
52 paucity of actionable biomarkers limits personalized therapies. Moreover, even when a  
53 targeted treatment option is available, drug resistance may arise<sup>7</sup> partly because of rare  
54 drug tolerant cells characterized by distinct transcriptional or mutational states<sup>11–17</sup>.

55 Determining tumour heterogeneity and its impact on drug response is essential to better  
56 stratify patients and aid in the development of personalized therapies. Expression-based  
57 biomarkers measured from bulk RNA-sequencing of a tumour biopsy are powerful  
58 predictors of drug response in vitro<sup>1,2,18</sup>, but average out tumour heterogeneity. Single-cell  
59 transcriptomics yields a molecular profile of each cell<sup>19,20</sup>, however, it is still unclear if and  
60 how it can inform clinical decision making. Here, we focused on tumour-derived breast  
61 cancer cell lines. We hypothesized that despite being simplistic models of tumours, cancer  
62 cell lines may exhibit themselves heterogeneous phenotypes, and serve as cell-state  
63 “primitives” to deconvolve tumour cell composition from patients’ biopsies for patient  
64 stratification and prediction of drug response.

65

66

## 67 **RESULTS**

68

### 69 **1. Single-cell Transcriptome Profiling of Breast cancer cell lines.**

70 We performed single cell RNA-sequencing (scRNA-seq) of 31 breast cancer cell lines  
71 (Supplementary Table 01) and one non-cancer cell line, MCF12A<sup>21</sup>, by means of the Drop-  
72 seq technology<sup>20</sup>. Following pre-processing (Methods), we retained a total of 35,276 cells,  
73 with an average of 1,069 cells per cell line and 3,248 genes captured per cell  
74 (Supplementary Figure 01 and Supplementary Table 01).

75 We next generated an atlas (<http://bcatlas.tigem.it>) encompassing the 32 BC cell  
76 lines, as shown in Figure 1A. In the atlas, luminal BC cell lines form a big “island” with  
77 multiple “peninsulas” with intermixing of cells from distinct cell lines; on the contrary,  
78 triple-negative breast cancer (TNBC) cell lines give rise to an “archipelago”, where cells  
79 tend to separate into distinct islands according to the cell line of origin, thus suggesting that  
80 TNBC cell lines represent instances of distinct diseases.

81 Single-cell expression of clinically relevant biomarkers (Figure 1B,C) including  
82 oestrogen receptor 1 (ESR1), progesterone receptor (PGR), Erb-B2 Receptor Tyrosine  
83 Kinase 2 (ERBB2 a.k.a. HER2) and the epithelial growth factor receptor (EGFR) across  
84 the different cell lines are in agreement with their reported status<sup>21–23</sup>.

85 To gain further insights into each cancer cell line, we analysed the expression of 48  
86 literature-based biomarkers of clinical relevance<sup>24</sup>, as reported in Figure 1D. Luminal cell  
87 lines highly express luminal epithelium genes, but neither basal epithelial nor stromal  
88 markers; on the contrary, triple-negative BC cell lines (11 out of 15) show a basal-like  
89 phenotype with the expression of at least one of keratin 5, 14 or 17<sup>25,26</sup>, with triple-negative  
90 subtype B (TNB) cell lines also expressing vimentin (VIM) and Collagen Type VI Alpha  
91 Chains (COL6A1, COL6A2, COL6A3)<sup>21</sup>. Interestingly, two out of five HER2

92 overexpressing (HER2<sup>+</sup>) cell lines (JIMT1 and HCC1954) in the atlas are in the triple-  
93 negative “archipelago” and express keratin 5 (KRT5) (Figure 1A,D), which has been linked  
94 to poor prognosis and trastuzumab resistance<sup>27</sup>. Indeed, both cell lines are resistant to anti-  
95 HER2 treatments<sup>28</sup>. Finally, the non-tumorigenic MCF12A cell line lacks expression of  
96 ESR1, PGR and HER2 and displays a basal-like phenotype characterized by the expression  
97 of all basal-like marker genes including keratin 5, 14, 17 and TP63, in agreement with the  
98 literature<sup>29</sup>.

99 Overall, these results show that single cell transcriptomics can be successfully used  
100 to capture the overall expression of clinically relevant markers.

101

102

103

## 2. The BC single-cell atlas identifies clinically relevant transcriptional signatures.

104 By clustering the 35,276 single-cells in the atlas, we identified 22 clusters, as shown in  
105 Figure 1E. Within the luminal island, cells did not cluster according to their cell line of  
106 origin, indeed four out of the five luminal clusters contain cells from distinct cell lines  
107 (Figure 1F and Supplementary Figure 02). On the contrary, triple-negative cell lines  
108 clustered according to their cell line of origin, with each cluster containing mostly cells  
109 from the same cell line (Figure 1F).

110 We identified genes specifically expressed among cells in the same cluster for a  
111 total of 22 biomarkers, one for each cluster (Figure 1G,H and Supplementary Figure 03).  
112 Interestingly, neither *ESR1* nor *ERRB2* were part of this set. Literature mining confirmed  
113 the significance of some of these markers: clusters in the luminal island (Figure 1G) were  
114 associated to genes involved in cancer progression (BCAS3<sup>30,31</sup> cluster 2), dissemination  
115 (SCGB2A2<sup>32,33</sup> cluster 6), proliferation (DRAIC<sup>34,35</sup> cluster 1), migration and invasion  
116 (CLCA2<sup>36,37</sup> cluster 8 and PIP<sup>38</sup> cluster 18). Interestingly, whereas DRAIC is correlated  
117 with poorer survival of luminal BC patients<sup>35</sup>, both CLCA2 and PIP are significantly  
118 associated with a favourable prognosis<sup>36,37,39,40</sup>.

119 To examine the clinical relevance of these 22 biomarkers, we analysed their  
120 expression across 937 breast cancer patients from the TGCA collection encompassing all  
121 four BC types. Out of the 22 biomarkers, two (MAGEA4 and XAGE2) could not be  
122 mapped to the TGCA dataset. As shown in Figure 1H, there is a marked difference in the  
123 expression of the 20 cluster-derived biomarkers across Luminal A, Luminal B, Her2  
124 positive and Triple Negative patients. Moreover, it is possible to distinguish subtypes  
125 within each category, which may lead to novel diagnostic/prognostic biomarkers (Figure  
126 1H and Supplementary Figure 04). For example, one subset of triple-negative patients  
127 strongly expresses the protease kallikrein-10 (KLK10), which has been associated with  
128 poor prognosis, poor response to tamoxifen treatment<sup>41</sup> and identified as potential target to  
129 reverse trastuzumab resistance<sup>42</sup>. Whereas a second subset is characterised by actin gamma  
130 2 expression (ACTG2), which has been linked in BC to cell proliferation<sup>43</sup> and platinum-  
131 based chemotherapy sensitivity<sup>44-47</sup>.

132 Finally, we compared the performance of the 20 biomarker genes in classifying BC  
133 subtypes from bulk RNA-seq data (Methods) against the PAM50 gene signature (50  
134 genes)<sup>6</sup> used in clinics to identify breast cancer subtypes (Figure 1I). The performances  
135 were overall comparable, with the obvious exceptions of HER2-overexpressing cancers.  
136 Indeed, when adding *ERBB2* to the list of 20 cluster-based biomarkers, classification of  
137 this subtypes markedly improved (Figure 1I).

138 Altogether, these analyses confirm that the single cell BC cell line atlas allows  
139 identifying clinically relevant gene signatures useful for patient stratification and tumour  
140 type classification.

141

### 142 **3. The BC atlas as a reference for automated cancer diagnosis**

143 The BC atlas can be used as a reference against which to compare single cell  
144 transcriptomics data from a patient's tissue biopsy and to perform cancer subtype  
145 classification and assessment of tumour heterogeneity. To this end, we developed an  
146 algorithm able to map single-cell transcriptional profiles from a patient onto the BC atlas  
147 and to assign a specific cell line to each of the patient's cells (Methods). We first tested the  
148 ability of the algorithm in correctly classifying the very cells in the atlas starting from their  
149 single-cell transcriptional profiles and correctly classified 92% of the cells (Supplementary  
150 Figure 05). We then turned to single-cell transcriptional profiles obtained from five triple-  
151 negative breast cancer patients<sup>48</sup>. As shown in Figure 2A, most, but not all the patients'  
152 cells mapped to the triple-negative "archipelago", except for the TNBC5 sample, for which  
153 most cells mapped to the luminal island. As the algorithm assigns a specific cell line to  
154 each tumour cell, it is also possible to look at the cell line composition of each patient, as  
155 reported in Figure 2B. These results demonstrates that heterogeneity varies across patients  
156 but is present in all the samples, as no patient's biopsy mapped to a single cell line.  
157 Moreover, information on the drug sensitivity of the individual cell lines composing the  
158 tumour may prove useful in guiding therapeutic choices.

159 We next tested the algorithm on spatial transcriptomics dataset obtained from the  
160 tissue biopsy of two patients, one diagnosed with ESR1<sup>+</sup>/ERBB2<sup>+</sup> lobular oestrogen  
161 positive carcinoma (Figure 2C-E and Supplementary Figure 06A) and the other with  
162 ESR1<sup>+</sup>/ERBB2<sup>+</sup> ductal carcinoma (Supplementary Figure 06C,D)<sup>49</sup>. The dataset consists  
163 of 3,808 transcriptional profiles for patient 1 (Figure 2C) and 3,615 profiles for patient 2  
164 (Supplementary Figure 06C), each obtained from a different tissue "tile" of size 100um x  
165 100um x 100 um. The algorithm projected each of the spatial tiles onto the BC atlas and  
166 assigned a cell line to each tile. We coloured the tiles according to the cell line and the BC  
167 subtype of the cell line (Figure 2C) to yield an automatic cancer subtype classification of  
168 tiles. Most of the tiles for both patients were assigned to just two cell lines and correctly  
169 classified as luminal (A or B); the remaining 13% of the tiles for patient 1 and 20% for  
170 patient 2 were instead classified either as HER2-overexpressing or Triple Negative, which  
171 could be an important information to guide therapeutic choice and to predict the occurrence  
172 of drug resistance.

173 As bulk gene expression profiles are more clinically relevant than single-cell gene  
174 expression profiles, we next trained a deconvolution algorithm Bisque<sup>50</sup> (Methods and  
175 Supplementary Figure 07) by leveraging our single-cell atlas to predict the cell line  
176 composition of a tumour sample. To test the effectiveness of this algorithm, we collected  
177 937 bulk gene expression profiles from breast cancer patients in TCGA whose BC subtypes  
178 were annotated, and then assigned to each patient the corresponding cell line composition,  
179 as shown in Figure 2D,E. Reassuringly, patients diagnosed with a specific breast cancer  
180 subtype tend to have a tumour cell line composition consisting of cell lines of the same  
181 subtype. We quantified this observation in Figure 2F and observed some interesting  
182 exceptions: JIMT-1 is an HER2-overexpressing cell line with an amplified ERBB2 locus,  
183 but no HER2<sup>+</sup> patient was mapped to this cell line. Interestingly, JIMT-1 cells are resistant

184 to anti-HER2 treatments<sup>51</sup>; another example is the HS578T cell line, which is reported to  
185 be triple-negative, however the majority of patients who map to it are luminal; surprisingly,  
186 this cell line has been reported to be sensitive to fulvestrant<sup>1,2</sup>, an anti-ESR1 drug.

187 These results show that this single cell atlas of cancer cell can be used to  
188 automatically assign cell line composition and cancer subtypes both from single-cell  
189 expression profiles and bulk gene expression profile.

190

#### 191 **4. Clinically relevant biomarkers exhibit heterogenous and dynamic expression in BC** 192 **cell lines.**

193 Clinically relevant receptors are heterogeneously expressed across cells belonging to the  
194 same cell line, as assessed by computing the percentage of cells in a cell line expressing  
195 the receptor as in Figure 3A. Consider the seven Luminal B and HER2<sup>+</sup> cell lines present  
196 in the BC atlas, which by definition overexpress HER2: whereas more than 90% of cells  
197 in AU565, BT574 and HCC1954 cell lines express *ERBB2*, in the remaining four cell lines  
198 *ERBB2* expression ranged from 31% of EVSAT cells to 46% of JIMT1 cells and up to 64%  
199 of MDA-MB-361 cells. This happens despite both JIMT1 and MDA-MB-361 harbour a  
200 copy number gain of the locus containing the *ERBB2*<sup>52</sup>. We first excluded the possibility  
201 that these results were artifacts of single-cell RNA-sequencing technology (Supplementary  
202 Figure 08). We then assessed HER2 protein levels by flow cytometry in three  
203 representative cell lines: AU565 (high HER2 expression), MDA-MB-361 (heterogeneous  
204 HER2 expression) and HCC38 cell lines (low HER2 expression). As shown in Figure 3B,  
205 single-cell transcriptional data agree with the cytometric analysis; however, the origin of  
206 this heterogeneity is unclear. To exclude heritable genetic differences as a source of  
207 heterogeneity, we sorted MDA-MB-361 cells into HER2<sup>+</sup> and HER2<sup>-</sup> subpopulations  
208 (Methods) and checked whether these homogenous subpopulations were stable over time,  
209 or rather spontaneously gave rise to heterogeneous populations. As shown in Figure 3C,  
210 after 18 days in culture, both subpopulations re-established the original heterogeneity,  
211 demonstrating that HER2 expression in these cells is dynamic and driven by a yet  
212 undiscovered mechanism.

213 Interestingly, HER2<sup>+</sup> circulating tumour cells (CTCs) isolated from an ER<sup>+</sup>/HER2<sup>-</sup>  
214 breast cancer patient were shown to spontaneously interconvert from HER2<sup>-</sup> and HER2<sup>+</sup>,  
215 with cells harbouring a phenotype producing daughters of the opposite one<sup>53</sup>. To check if  
216 cell-cycle phase could explain the observed heterogeneity in the MDA-MB-361 cell line,  
217 we computationally predicted (Methods) the cell cycle phase of each cell in both the HER2<sup>-</sup>  
218 and HER2<sup>+</sup> subpopulations from single cell transcriptomics data<sup>54</sup>. A higher proportion of  
219 HER2<sup>-</sup> cells was predicted to be in S/G2/M phases when compared to HER2<sup>+</sup> cells (Figure  
220 3D). This result is consistent with previous observations that report cell cycle arrest in  
221 G2/M phase following HER2 inhibition<sup>55</sup>.

222 We next set to identify biological processes differing between the two  
223 subpopulations by computing differentially expressed genes (DEGs) from the single-cell  
224 transcriptional profiles of HER2<sup>+</sup> cells against HER2<sup>-</sup> cells (Supplementary Table 02).  
225 Gene Set Enrichment Analyses (GSEA)<sup>56</sup> against the ranked list of DEGs, reported in  
226 Figure 3E, revealed seven significantly enriched pathways (FDR<10%): four of which  
227 were upregulated in HER2<sup>+</sup> cells, but downregulated in HER2<sup>-</sup> cells, and included  
228 adipogenesis, myogenesis and OXPHOS, all indicative of EMT engagement, which has  
229 been reported in HER2<sup>+</sup> cells<sup>57-59</sup>; the remaining three pathways were upregulated in

230 HER2<sup>-</sup> cells and related to cell-cycle and specifically to G2/M phase, in agreement with  
231 our previous analysis, suggesting that cell cycle may play a role in HER2 expression in this  
232 cell line.

233 These results show that heterogeneity in the expression of clinically relevant  
234 biomarkers is present even in cell lines and that it can also be dynamic and of a non-genetic  
235 nature.

236

## 237 **5. Heterogeneity in gene expression affects drug response.**

238 To investigate the role of heterogeneity in gene expression within a cell line on drug  
239 response, we collected large-scale in vitro drug screening data<sup>1,2</sup> reporting the effect of 450  
240 drugs on 658 cancer cell lines from solid tumours. As show in Figure 3F and  
241 Supplementary Figure 09, sensitivity of the BC cell lines to HER2 inhibitors was  
242 significantly correlated with the percentage of cells in the cell line expressing *ERBB2*  
243 (Supplementary Table 03). Receptor expression level is substantially the same across cells  
244 expressing it, irrespective of the cell line they belong to (Supplementary Figure 10), except  
245 for cell lines harbouring CNVs of the *ERBB2* locus. Furthermore, we found that the  
246 correlation between drug target expression and drug sensitivity holds true also for several  
247 other targets (Figure 3G), thus suggesting that variability in gene expression within cells  
248 of the same tumour may cause some cells to respond poorly to the drug treatment.

249 Starting from these observations, we developed DREEP (DRug Estimation from  
250 single-cell Expression Profiles), a novel bioinformatics tool that, starting from single-cell  
251 transcriptional profiles, allows to predict drug response at the single cell level. To this end,  
252 we first detected expression-based biomarkers of drug sensitivity for 450 drugs<sup>2</sup>, as  
253 schematised in Figure 4H,I (Methods). Briefly, we crossed data from the Cancer Cell Line  
254 Encyclopaedia (CCLE) on the response to 450 drugs across 658 cancer cell lines from solid  
255 tumours with their gene expression profiles from bulk RNA-seq. In the CCLE, drug  
256 potency is evaluated as the inverse of the Area Under the Curve (AUC) of the dose-  
257 response graph, with low values of the AUC indicating drug sensitivity, while high values  
258 implying drug resistance (Figure 3H). For each gene and for each drug, we computed the  
259 correlation between the expression of the gene across the 658 cell lines with the drug  
260 potency in the same cell lines. Hence, genes positively correlated with the AUC are  
261 potential markers of resistance, vice-versa, negatively correlated genes are markers of  
262 sensitivity (Figure 3H). In this way, we generated a ranked list of expression-based  
263 biomarkers of drug sensitivity and resistance for each of the 450 drugs. We then used these  
264 biomarkers to predict drug sensitivity at the single-cell level (Figure 3I). To this end, the  
265 250 genes most expressed of each cell in the atlas were compared against the ranked list of  
266 biomarkers for each one of 450 drugs by means of GSEA<sup>56</sup> and thus associated to the drug  
267 it is most sensitive to, or to no drug, if no significant enrichment score from GSEA is found  
268 (Figure 3I).

269 To assess the algorithm's performance, we applied it to the single-cell BC atlas and  
270 estimated its performance by checking how well we could predict sensitivity of the 32 BC  
271 cell lines to 86 drugs for which this information was publicly available<sup>60</sup> (Figure 3J). To  
272 convert single-cell predictions to predictions at the cell line level, we simply used the  
273 percentage of cells in the cell line deemed to be sensitive to the drug by the algorithm. To  
274 experimentally validate DREEP, we turned to the MDA-MB-361 cell line for which we  
275 found coexistence of two distinct and dynamic cell subpopulations (HER2<sup>+</sup> and HER2<sup>-</sup>).

276 We applied DREEP to each subpopulation to identify drugs able to selectively inhibit  
277 growth of either the HER2<sup>-</sup> subpopulation or the HER2<sup>+</sup> subpopulation: 42 drugs (FDR <  
278 1%, Supplementary Table 04) were predicted to preferentially inhibit growth of HER2<sup>-</sup>  
279 cells; the most overrepresented class among these drugs was that of inhibitors of DNA  
280 topoisomerases (TOP1/TOP2A) (Supplementary Figure 11) such as Etoposide.  
281 Surprisingly, no drug was found to specifically inhibit growth of HER<sup>+</sup> cells, whereas 44  
282 drugs (FDR <1%) were predicted to be equally effective on both subpopulations and  
283 unexpectedly included HER2 inhibitors, such as afatinib (Supplementary Table 03 and  
284 Supplementary Figure 12).

285 We selected etoposide and afatinib for further experimental validation. MDA-MB-  
286 361 cells were first sorted by FACS into HER2<sup>+</sup> and HER2<sup>-</sup> subpopulations and then cell  
287 viability was measured following 72h drug treatment at five different concentrations as  
288 shown in Figure 3K (and Supplementary Table 05). In agreement with DREEP predictions,  
289 HER2<sup>-</sup> cells were much more sensitive to etoposide than HER2<sup>+</sup> cells, while afatinib was  
290 equally effective on both subpopulations. This counterintuitive result was similar to that  
291 observed by Jordan et al<sup>53</sup> using circulating tumour cells from a BC patient sorted into  
292 HER2<sup>-</sup> and HER2<sup>+</sup> subpopulations, which were found to be equally sensitive to Lapatinib  
293 (another HER2 inhibitor), but no mechanism of action was put forward.

294 We hypothesise that the dynamic interconversion of MDA-MB-361 cells between  
295 the HER2<sup>-</sup> and the HER2<sup>+</sup> state may explain this surprising result: when the starting  
296 population consists of HER2<sup>-</sup> cells only, some of these cells will nevertheless interconvert  
297 to HER2<sup>+</sup> cells during afatinib treatment, and they will thus become sensitive to HER2  
298 inhibition, explaining the observed results. We mathematically formalised this hypothesis  
299 with a simple mathematical model (Supplementary Figure 13 and in the Supplementary  
300 Material) where two species (HER2<sup>+</sup> and HER2<sup>-</sup> cells) can replicate and interconvert, but  
301 only one (HER2<sup>+</sup>) is affected by afatinib treatment. The model shows that if the  
302 interconversion time between the two cell states is comparable to that of the cell cycle, then  
303 afatinib treatment will have the same effect on both subpopulations. If instead the  
304 interconversion time is much longer than the cell cycle, then afatinib will have little effect  
305 on HER2<sup>-</sup> sorted cells, but maximal effects on HER2<sup>+</sup> sorted cells, and vice-versa, if the  
306 interconversion time is much shorter than the cell cycle, then afatinib's effect would be  
307 minimal on both HER2<sup>-</sup> and HER2<sup>+</sup> sorted cells.

308 Comparison of the modelling results with the experimental results thus suggests  
309 that the interconversion rate should be of the same order of the cell cycle (about 72h for  
310 MDAM361 cells). The model further predicts that treating the unsorted population of  
311 MDA-MB-361 cells with afatinib reduces the percentage of HER2<sup>+</sup> cells, since only  
312 HER2<sup>+</sup> will be affected, but that this percentage quickly recovers once Afatinib treatment  
313 is interrupted (Supplementary Figure 14 and 15 and Supplementary Material).

314 To test modelling predictions, we treated the MDAM361 cell line (without sorting)  
315 with afatinib and etoposide and then assessed by cytofluorimetry the percentage of HER2<sup>+</sup>  
316 and HER2<sup>-</sup> cells before and after the treatment. As shown in Figure 3L,M (Supplementary  
317 Table 06 and Supplementary Table 07) etoposide increased the percentage of HER2<sup>+</sup> cells,  
318 in agreement with the increased sensitivity of HER2<sup>-</sup> cells to this treatment, whereas  
319 afatinib strongly decreased the percentage of HER2<sup>+</sup> cells, confirming that its effect is  
320 specific for HER2<sup>+</sup> cells only. We next measured the percentage of HER2<sup>+</sup> cells following  
321 removal of afatinib from the medium; as shown in Figure 3N,O the percentage of HER2<sup>+</sup>

322 cells quickly increased confirming the modelling results (Supplementary Figure 15 and  
323 Supplementary Material).

324 All together our results show that DREEP can predict drug sensitivity from single-  
325 cell transcriptional profiles and that dynamic heterogeneity in gene expression does play a  
326 significant role in how the cell population will respond to the drug treatment.

327

### 328 **Discussion**

329 In this study we provide the first transcriptional characterization at single cell level of a  
330 panel of 32 breast cell lines. We show that single cell transcriptomics can be used to capture  
331 the expression of clinically relevant markers. We show that breast-cancer cell lines express  
332 clinically relevant BC receptors heterogeneously among cells within the same cell line.  
333 Moreover, we observed dynamic plasticity in the regulation of HER2 expression in the  
334 MDA-MB-361 cell line with striking consequences on drug response. This phenomenon  
335 has been recently observed also in circulating tumour cells of a BC patient<sup>53</sup> and in other  
336 cell lines<sup>17,61</sup>.

337 We determined cell line composition of patients' biopsies both from both single-  
338 cell and bulk gene expression profiles. Estimation of cancer cell line composition provides  
339 an alternative and more information-rich framework to link bulk gene expression  
340 measurement of patient's biopsies to preclinical cancer models. Knowledge of drugs to  
341 which cancer cell lines are sensitive to may also inform drug treatment for patients for  
342 which bulk gene expression profiles have been measured.

343 Single cell transcriptomics is still not clinically ready because of the costs and time  
344 needed, however this work shows the importance of performing single-cell sequencing on  
345 the available cancer models, including cell lines and organoids to build a set of cell cancer  
346 states with known phenotypes and drug response to which patients' tumour can be mapped  
347 to make a leap in personalised diagnosis, prognosis and treatment of cancer patients.

348

349



## References

1. Iorio, F. *et al.* A Landscape of Pharmacogenomic Interactions in Cancer. *Cell* **166**, 740–754 (2016).
2. Rees, M. G. *et al.* Correlating chemical sensitivity and basal gene expression reveals mechanism of action. *Nat Chem Biol* **12**, 109–116 (2016).
3. Cardoso, F. *et al.* 70-Gene Signature as an Aid to Treatment Decisions in Early-Stage Breast Cancer. *N. Engl. J. Med.* **375**, 717–729 (2016).
4. Sparano, J. A. *et al.* Prospective Validation of a 21-Gene Expression Assay in Breast Cancer. *N. Engl. J. Med.* **373**, 2005–2014 (2015).
5. Sparano, J. A. *et al.* Adjuvant Chemotherapy Guided by a 21-Gene Expression Assay in Breast Cancer. *N. Engl. J. Med.* **379**, 111–121 (2018).
6. Cheang, M. C. U. *et al.* Defining Breast Cancer Intrinsic Subtypes by Quantitative Receptor Expression. *Oncologist* **20**, 474–482 (2015).
7. Harbeck, N. *et al.* Breast cancer. *Nature Reviews Disease Primers* **5**, (2019).
8. Andre, F. *et al.* Use of Biomarkers to Guide Decisions on Adjuvant Systemic Therapy for Women With Early-Stage Invasive Breast Cancer: ASCO Clinical Practice Guideline Update—Integration of Results From TAILORx. *J. Clin. Oncol.* **37**, 1956–1964 (2019).
9. Garnett, M. J. *et al.* Systematic identification of genomic markers of drug sensitivity in cancer cells. *Nature* **483**, 570–575 (2012).
10. Foulkes, W. D., Smith, I. E. & Reis-Filho, J. S. Triple-Negative Breast Cancer. *N. Engl. J. Med.* **363**, 1938–1948 (2010).
11. Sharma, S. V. *et al.* A Chromatin-Mediated Reversible Drug-Tolerant State in Cancer Cell Subpopulations. *Cell* **141**, 69–80 (2010).
12. Shaffer, S. M. *et al.* Rare cell variability and drug-induced reprogramming as a mode of cancer drug resistance. *Nature* **546**, 431–435 (2017).
13. Ebinger, S. *et al.* Characterization of Rare, Dormant, and Therapy-Resistant Cells in Acute Lymphoblastic Leukemia. *Cancer Cell* **30**, 849–862 (2016).
14. Meyer, A. S. & Heiser, L. M. Systems biology approaches to measure and model phenotypic heterogeneity in cancer. *Curr. Opin. Syst. Biol.* **17**, 35–40 (2019).
15. Marusyk, A., Janiszewska, M. & Polyak, K. Intratumor Heterogeneity: The Rosetta Stone of Therapy Resistance. *Cancer Cell* **37**, 471–484 (2020).
16. Shaffer, S. M. *et al.* Memory Sequencing Reveals Heritable Single-Cell Gene Expression Programs Associated with Distinct Cellular Behaviors. *Cell* **182**, 947–959.e17 (2020).
17. Schuh, L. *et al.* Gene Networks with Transcriptional Bursting Recapitulate Rare Transient Coordinated High Expression States in Cancer. *Cell Syst.* **10**, 363–378.e12 (2020).
18. Costello, J. C. *et al.* A community effort to assess and improve drug sensitivity prediction algorithms. *Nat Biotechnol* **32**, 1202–1212 (2014).
19. Zheng, G. X. Y. *et al.* Massively parallel digital transcriptional profiling of single cells. *Nat. Commun.* **8**, 1–12 (2017).
20. Macosko, E. Z. *et al.* Highly Parallel Genome-wide Expression Profiling of Individual Cells Using Nanoliter Droplets. *Cell* **161**, 1202–1214 (2015).
21. Dai, X., Cheng, H., Bai, Z. & Li, J. Breast cancer cell line classification and its relevance with breast tumor subtyping. *J. Cancer* **8**, 3131–3141 (2017).
22. Soliman, N. A. & Yussif, S. M. Ki-67 as a prognostic marker according to breast cancer molecular subtype. *Cancer Biol. Med.* **13**, 496–504 (2016).
23. Tajadura-Ortega, V. *et al.* O-linked mucin-type glycosylation regulates the transcriptional programme downstream of EGFR. *Glycobiology* (2020). doi:10.1093/glycob/cwaa075
24. Karaayvaz, M. *et al.* Unravelling subclonal heterogeneity and aggressive disease states in TNBC through single-cell RNA-seq. *Nat. Commun.* **9**, (2018).
25. Badve, S. *et al.* Basal-like and triple-negative breast cancers: A critical review with an emphasis on the implications for pathologists and oncologists. *Mod. Pathol.* **24**, 157–167 (2011).
26. Gusterson, B. Do ‘basal-like’ breast cancers really exist? *Nat. Rev. Cancer* **9**, 128–134 (2009).
27. Martin-Castillo, B. *et al.* Cytokeratin 5/6 fingerprinting in HER2-positive tumors identifies a poor prognosis and trastuzumab-resistant Basal-HER2 subtype of breast cancer. *Oncotarget* **6**, 7104–7122 (2015).
28. Jernström, S. *et al.* Drug-screening and genomic analyses of HER2-positive breast cancer cell lines reveal predictors for treatment response. *Breast Cancer Targets Ther.* **9**, 185–198 (2017).
29. Sweeney, M. F., Sonnenschein, C. & Soto, A. M. Characterization of MCF-12A cell phenotype, response to estrogens, and growth in 3D. *Cancer Cell Int.* **18**, 1–12 (2018).
30. Gururaj, A. E. *et al.* MTA1, a transcriptional activator of breast cancer amplified sequence 3. *Proc. Natl. Acad. Sci. U. S. A.* **103**, 6670–6675 (2006).
31. Bärlund, M. *et al.* Cloning of BCAS3 (17q23) and BCAS4 (20q13) genes that undergo amplification, overexpression, and fusion in breast cancer. *Genes Chromosom. Cancer* **35**, 311–317 (2002).
32. Zehentner, B. K. & Carter, D. Mammaglobin: A candidate diagnostic marker for breast cancer. *Clin. Biochem.* **37**, 249–257 (2004).
33. Al Joudi, F. S. Human mammaglobin in breast cancer: A brief review of its clinical utility. *Indian J. Med. Res.* **139**, 675–685 (2014).
34. Sun, M., Gadad, S. S., Kim, D. S. & Kraus, W. L. Discovery, Annotation, and Functional Analysis of Long Noncoding RNAs Controlling Cell-Cycle Gene Expression and Proliferation in Breast Cancer Cells. *Mol. Cell* **59**, 698–711 (2015).
35. Zhao, D. & Dong, J. T. Upregulation of long non-coding RNA DRAIC correlates with adverse features of breast cancer. *Non-coding RNA* **4**, 1–9 (2018).
36. Qiang, Y. Y. *et al.* Along with its favorable prognostic role, CLCA2 inhibits growth and metastasis of nasopharyngeal

- carcinoma cells via inhibition of FAK/ERK signaling. *J. Exp. Clin. Cancer Res.* **37**, 1–14 (2018).
37. Li, X., Cowell, J. K. & Sossey-Alaoui, K. CLCA2 tumour suppressor gene in 1p31 is epigenetically regulated in breast cancer. *Oncogene* **23**, 1474–1480 (2004).
38. Urbaniak, A., Jablonska, K., Podhorska-Okolow, M., Ugorski, M. & Dziegiel, P. Prolactin-induced protein (PIP)-characterization and role in breast cancer progression. *Am. J. Cancer Res.* **8**, 2150–2164 (2018).
39. Debily, M. A. *et al.* A functional and regulatory network associated with PIP expression in human breast cancer. *PLoS One* **4**, (2009).
40. Gruber, A. D. & Pauli, B. U. Tumorigenicity of Human Breast Cancer Is Associated with Loss of the Ca<sup>2+</sup>-activated Chloride Channel CLCA2. *Cancer Res.* **59**, 5488 LP – 5491 (1999).
41. Wang, Z. *et al.* Identification of KLK10 as a therapeutic target to reverse trastuzumab resistance in breast cancer. *Oncotarget* **7**, 79494–79502 (2016).
42. Luo, L.-Y., Diamandis, E. P., Look, M. P., Soosaipillai, A. P. & Foekens, J. A. Higher expression of human kallikrein 10 in breast cancer tissue predicts tamoxifen resistance. *Br. J. Cancer* **86**, 1790–1796 (2002).
43. Dugina, V., Shagieva, G., Khromova, N. & Kopnin, P. Divergent impact of actin isoforms on cell cycle regulation. *Cell Cycle* **17**, 2610–2621 (2018).
44. Lu, X. *et al.* Establishment of a Predictive Genetic Model for Estimating Chemotherapy Sensitivity of Colorectal Cancer with Synchronous Liver Metastasis. *Cancer Biother. Radiopharm.* **28**, 552–558 (2013).
45. Edfeldt, K., Hellman, P., Westin, G. & Stalberg, P. A plausible role for actin gamma smooth muscle 2 (ACTG2) in small intestinal neuroendocrine tumorigenesis. *BMC Endocr. Disord.* **16**, 19 (2016).
46. Xu, C.-Z. *et al.* Gene and microRNA expression reveals sensitivity to paclitaxel in laryngeal cancer cell line. *Int. J. Clin. Exp. Pathol.* **6**, 1351–1361 (2013).
47. Verrills, N. M. *et al.* Alterations in  $\gamma$ -Actin and Tubulin-Targeted Drug Resistance in Childhood Leukemia. *JNCI J. Natl. Cancer Inst.* **98**, 1363–1374 (2006).
48. Gao, R. *et al.* Delineating copy number and clonal substructure in human tumors from single-cell transcriptomes. *Nat. Biotechnol.* (2021). doi:10.1038/s41587-020-00795-2
49. Genomics, 10x. 10X Genomics datasets. Available at: <https://wp.10xgenomics.com/resources/datasets>.
50. Jew, B. *et al.* Accurate estimation of cell composition in bulk expression through robust integration of single-cell information. *Nat. Commun.* **11**, 1971 (2020).
51. Tanner, M. *et al.* Characterization of a novel cell line established from a patient with Herceptin-resistant breast cancer. *Mol. Cancer Ther.* **3**, 1585 LP – 1592 (2004).
52. Ghandi, M. *et al.* Next-generation characterization of the Cancer Cell Line Encyclopedia. *Nature* **569**, 503–508 (2019).
53. Jordan, N. V. *et al.* HER2 expression identifies dynamic functional states within circulating breast cancer cells. *Nature* **537**, 102–106 (2016).
54. Butler, A., Hoffman, P., Smibert, P., Papalexi, E. & Satija, R. Integrating single-cell transcriptomic data across different conditions, technologies, and species. *Nat. Biotechnol.* **36**, 411 (2018).
55. Yan, Y. *et al.* A novel function of HER2/Neu in the activation of G2/M checkpoint in response to  $\gamma$ -irradiation. *Oncogene* **34**, 2215–2226 (2015).
56. Subramanian, A. *et al.* Gene set enrichment analysis: a knowledge-based approach for interpreting genome-wide expression profiles. *Proc. Natl. Acad. Sci. U. S. A.* **102**, 15545–50 (2005).
57. Ishay-Ronen, D. *et al.* Gain Fat—Lose Metastasis: Converting Invasive Breast Cancer Cells into Adipocytes Inhibits Cancer Metastasis. *Cancer Cell* **35**, 17-32.e6 (2019).
58. Ingthorsson, S. *et al.* HER2 induced EMT and tumorigenicity in breast epithelial progenitor cells is inhibited by coexpression of EGFR. *Oncogene* **35**, 4244–4255 (2016).
59. Savci-Hejjink, C. D. *et al.* Epithelial-to-mesenchymal transition status of primary breast carcinomas and its correlation with metastatic behavior. *Breast Cancer Res. Treat.* **174**, 649–659 (2019).
60. Yang, W. *et al.* Genomics of Drug Sensitivity in Cancer (GDSC): a resource for therapeutic biomarker discovery in cancer cells. *Nucleic Acids Res.* **41**, D955–D961 (2013).
61. Gupta, P. B. *et al.* Stochastic State Transitions Give Rise to Phenotypic Equilibrium in Populations of Cancer Cells. *Cell* **146**, 633–644 (2011).
62. Dobin, A. *et al.* STAR: ultrafast universal RNA-seq aligner. *Bioinformatics* **29**, 15–21 (2012).
63. Harrow, J. *et al.* GENCODE: The reference human genome annotation for The ENCODE Project. *Genome Res.* **22**, 1760–1774 (2012).
64. Smith, T., Heger, A. & Sudbery, I. UMI-tools: modeling sequencing errors in Unique Molecular Identifiers to improve quantification accuracy. *Genome Res.* **27**, 491–499 (2017).
65. Gambardella, G. & di Bernardo, D. A Tool for Visualization and Analysis of Single-Cell RNA-Seq Data Based on Text Mining. *Front. Genet.* **10**, (2019).
66. Slovin, S. *et al.* Single-Cell RNA Sequencing Analysis: A Step-by-Step Overview. in (ed. Picardi, E.) 343–365 (Springer US, 2021). doi:10.1007/978-1-0716-1307-8\_19
67. Robinson, M. D., McCarthy, D. J. & Smyth, G. K. edgeR: a Bioconductor package for differential expression analysis of digital gene expression data. *Bioinformatics* **26**, (2010).
68. McInnes, L., Healy, J. & Melville, J. UMAP: Uniform Manifold Approximation and Projection for Dimension Reduction. *Prepr.* <https://arxiv.org/abs/1802.03426> (2018).
69. Levine, J. H. *et al.* Data-Driven Phenotypic Dissection of AML Reveals Progenitor-like Cells that Correlate with Prognosis. *Cell* **162**, 184–197 (2015).
70. Grossman, R. L. *et al.* Toward a Shared Vision for Cancer Genomic Data. *N. Engl. J. Med.* **375**, 1109–1112 (2016).

71. Colaprico, A. *et al.* TCGAbiolinks: an R/Bioconductor package for integrative analysis of TCGA data. *Nucleic Acids Res.* **44**, e71–e71 (2015).
72. Barretina, J. *et al.* The Cancer Cell Line Encyclopedia enables predictive modelling of anticancer drug sensitivity. *Nature* **483**, 603–607 (2012).

## 1 **Figures**

2

3 **Figure 1 – The Breast Cancer Single Cell Atlas.** (A) Representation of single-cell  
4 expression profiles of 35,276 cells from 32 cell lines color-coded according to cancer  
5 subtype (LA=Luminal A, LB=Luminal B, H=Her2 positive, TNA = Triple Negative A,  
6 TNB = Triple Negative B). (B) Expression levels of the indicated genes in the atlas,  
7 with red indicating expression, together with their (C) distribution within the cell  
8 lines, shown as a violin plot. (D) Dotplot of literature-based biomarker genes along  
9 the columns for each of the 32 sequenced cell lines along the rows. Biomarker genes  
10 are grouped by type (Basal Epith. = Basal Epithelial, Luminal Epith. = Luminal  
11 Epithelial, L.P. = Luminal Progenitor, EMT = Epithelial to Mesenchymal Transition).  
12 (E) Graphical representation of 35,276 cells color-coded according to their cluster of  
13 origin. Clusters are numbered from 1 to 22. (F) For the indicated cluster, the  
14 corresponding pie-chart represents the cluster composition in terms of cell lines. Cell  
15 lines in the same pie-chart are distinguished by colour. Only the top 10 most  
16 heterogenous clusters are shown. Cluster 2 is the most heterogeneous while cluster  
17 19 is the most homogeneous. (G) Expression levels in the atlas of the five luminal  
18 biomarkers identified as the most differentially expressed in each of the five luminal  
19 clusters (1, 2, 6, 8 and 18). (H) Expression of 20 out of 22 atlas-derived biomarkers in  
20 the biopsies of 937 breast cancer patient from TCGA. (I) Accuracy in classifying  
21 tumour subtype for 937 patients from TCGA by using either PAM50 or the 20 atlas  
22 derived biomarker genes (scCCL) alone or augmented with HER2 gene (scCCL +  
23 HER2).

24

25 **Figure 2 –Automatic classification of patients' tumour cells** (A) Cancer cells from  
26 triple negative breast cancer (TNBC) biopsies of 5 patients are embedded in the BC  
27 atlas to predict their tumour type. (B) For each patient, the pie chart shows cell line  
28 composition obtained by mapping patient's cells onto the atlas. (C) Tissue-slide of an  
29 oestrogen positive breast tumour biopsy sequenced using 10x Visium spatial  
30 transcriptomics (top-left) and the position of the mapped tissue tiles onto the atlas  
31 (top-left). Tiles are colour-coded according to the cell line (bottom-left) and to tumor  
32 subtype (bottom-right) as predicted by the mapping algorithm. (D) Cell line  
33 composition for each patient as estimated by the algorithm from bulk RNA-seq of 937  
34 BC patients. For ease of interpretation, in the heatmap patients are clustered  
35 according to their cell line composition. The bottom row reports the annotated cancer  
36 subtype in TGCA. (E) Predicted cell-line composition for four representative patients.  
37 (F) The distribution of the 937 BC patients across the 32 cell lines. For each cell line,  
38 the stacked bars report the percentage of patients of a given cancer subtype assigned  
39 by the algorithm to that cell line.

40

41 **Figure 3 – Transcriptional heterogeneity in breast cancer cell lines and its**  
42 **impact on drug response.** (A) Percentage of cells expressing the indicated genes in  
43 each of the sequenced 32 cell lines. (B) Fluorescence cytometry of HCC38, MDA-MB-

44 361 and AU565 cell lines stained with a fluorescent antibody against Her2. **(C)**  
45 Expression of HER2 protein in MDA-MB-361 cells is dynamic and re-established in  
46 less than 3 weeks. **(D)** Analysis of the cell cycle phase for the HER2+ and HER2-  
47 subpopulations of MDA-MB-361 cells. The cell cycle of each cell is estimated from its  
48 single-cell transcriptomics profile. **(E)** Enriched pathways (GSEA, FDR<10%) across  
49 the genes differentially expressed between the HER2+ and HER2- subpopulations of  
50 MDA-MB-361 cells. Orange refers to HER2+ subpopulation and blue to the HER2-  
51 ones. **(F)** Relationship between gene expression and drug potency for four anti-HER2  
52 drugs. Each dot corresponds to a cell line reporting the percentage of cells expressing  
53 ERBB2 or EGFR in the cell line [y-axis] and the drug potency [x-axis]. PCC (pearson  
54 correlation coefficient) and p-value are also shown. **(G)** Box-plot reporting the  
55 distribution of PCCs between percentage of cells expressing the cognate drug target  
56 and the potency of the drug across cell lines for 66 drugs for two different drug  
57 potency databases. For comparison, the PCC distribution when choosing a random  
58 gene in place of the cognate drug target is also shown. **(H)** Bioinformatics pipeline for  
59 the identification of drug sensitivity biomarkers for 450 drugs. For each drug, the  
60 expression of a gene across 658 cell lines is correlated with drug potency in the same  
61 cell lines; genes are then ranked from most positively correlated to the most  
62 negatively correlated. **(I)** The top 250 most expressed genes in a single cell are used  
63 as input for a Gene Set Enrichment Analysis (GSEA) against the ranked list of genes  
64 for each one of the 450 drugs to predict its drug sensitivity. At the end of the process,  
65 each cell in the sample is associated to the drug it is most sensitive to, or to no drug,  
66 if no significant enrichment score is found. Finally, for each of the 450 drugs, the  
67 number of cells predicted to be either sensitive, resistant, or not classified in the  
68 considered sample is estimated. **(J)** Validation of DREEP on the Breast Cancer Single  
69 Cell atlas data to predict drug sensitivity to 86 drugs. The PPV (Positive Predicted  
70 Value) is shown as a function of the percentage of cells in a cell line predicted to be  
71 sensitive to the same drug. Dashed line represents the performance of a random  
72 algorithm. **(K)** Dose-response curve for afatinib and etoposide on sorted MDA-MB-  
73 361 cell populations (triplicate experiment). **(L)** Percentage of HER2+ cells in MDA-  
74 MB-361 after 72h treatment with either afatinib (statistic: two-sided t-test, \*P ≤ 0.05;  
75 \*\*P ≤ 0.01; \*\*\*P ≤ 0.001) or etoposide and **(M)** measured cell viability after the  
76 treatment. **(N)** Percentage of HER2 positive cells in MDA-MB-361 cell-line at the  
77 indicated time-points either after 48h of afatinib pre-treatment (red bars) or without  
78 any afatinib pre-treatment (black bars) and **(O)** the relative number of cells rescaled  
79 for the number of cells at the beginning of the experiment.

80

81

## 82 **Methods**

83

84 **Cell culture:** The 32 cell lines used in this study were obtained from commercial providers and cultured in  
85 ATCC recommended complete media at 37°C and 5% CO<sub>2</sub>.

86

87 **DROP-seq platform set-up:** Single cell transcriptomic of the 32 cell lines was performed by implementing  
88 in-house the DROP-seq technology<sup>20</sup>. The microfluidics device for the generation of droplet was fabricated  
89 using a bio-compatible, silicon-based polymer, polydimethylsiloxane (PDMS) that was rendered  
90 hydrophobic with Aquapel® treatment as per protocol<sup>20</sup>. In each sequencing experiment, cell suspension,  
91 bead suspension and carrier oil (QX200 droplet generation oil, Bio-Rad) were first loaded in syringes and  
92 then placed in syringe pumps (Leafliud). Flow rates of syringe pumps were set at 4,000 µL/hr for both cell  
93 and barcoded bead suspensions while carrier oil syringe pump was set at 15,000 µL/hr. In each sequencing  
94 experiment, cells and barcoded beads were respectively diluted at the concentration of 200 cell/µL in PBS  
95 with BSA 0.01% (Merck) and 120 bead/µL in lysis buffer. A self-built magnetic stirrer system was used to  
96 keep in suspension barcoded beads. To count the occurrence of a single cell together with a barcoded bead  
97 several tests were performed without lyses buffer in the bead suspension. In these tests, we observed about  
98 5% of generated droplets filled with just one bead and one cell.

99 **Single cell RNA library preparation and sequencing:** For each sequencing experiment, the targeted  
100 number of cells to sequence was set to 2,000. Droplets were collected in a 50 mL falcon and broke by adding  
101 1 mL of Perfluoro-1-octanol. Captured RNA was reverse transcribed in a single reaction following the  
102 original protocol<sup>20</sup> and then digested with exonuclease 1 to degrade unbound primers. Next, cDNA was first  
103 amplified with a total of 12 PCR cycles and then purified using AMPure XP beads at 0.6X ratio. Finally, the  
104 quality of the resulting cDNA library was quantified with the BioAnalyzer High Sensitivity DNA Chip and  
105 its concentration measured using the Qubit Fluorometer. The Illumina Nextera XT v2 kit was used to produce  
106 the next generation sequencing (NGS) libraries using four aliquots of 600pg of each cDNA library. Quality  
107 and concentration of NGS libraries were respectively quantified on the BioAnalyzer High Sensitivity DNA  
108 Chip and Qubit Fluorometer. Finally, either Illumina NextSeq 500/550 or NovaSeq 6000 machines were used  
109 to sequence the produced NGS libraries (Supplementary Table 01). Samples processed with NextSeq500/550  
110 NGS library were diluted at the final concentration of 3 nM and sequenced using the 75-cycle high output  
111 flow cell while samples processed with NovaSeq 6000 machine were diluted at the final concentration of 250  
112 pM and sequenced using the S1 100 cycles flow cell.

113 **Read alignment and gene expression quantification:** Raw data processing was performed using the Drop-  
114 seq tools package version 1.13 and following the Drop-seq Core Computational Protocol  
115 (<http://mccarrolllab.org/dropseq>). Briefly, raw sequence data was filtered to remove all read pairs with at  
116 least one base in their barcode or UMI with a quality score less than 10. Then read 2 was trimmed at the 5'  
117 end to remove any TSO adapter sequence, and at the 3' end to remove polyA tails. Reads were then aligned  
118 using STAR<sup>62</sup> on hg38 human genome (primary assembly, version 28) downloaded from GENCODE<sup>63</sup>.  
119 After reads alignment, UMI tool<sup>64</sup> was used to perform UMI deduplication and quantify the number of gene  
120 transcripts in each cell. The initial number of sequenced cells was identified using a simple (knee-like)  
121 filtering rule as implemented by CellRanger 2.2.x. After this, only high depth cells with at least 2,500 UMI,  
122 more than 1,000 captured genes and with less than 50% of reads aligned on mitochondrial gene were retained.  
123 Putative multiples among the sequenced cells of each BC cell line were simply discarded identifying outliers  
124 in the count depth distribution by using Tukey's method based on lower and upper quartiles with k equal to  
125 3.

126 **BC Atlas Construction:** Single cells expression profiles were normalized using GF-ICF (Gene Frequency  
127 – Inverse Cell Frequency) normalization using the *gficf* package<sup>65,66</sup> for R statistical environment  
128 (<https://github.com/dibbelab/gficf>). GF-ICF is based on a data transformation model called term frequency-  
129 inverse document frequency (TF-IDF) that has been extensively used in the field of text mining. GF-ICF  
130 transformation was applied on CPM (count per million) after *EdgeR* normalization<sup>67</sup> and discarding genes

131 expressed in less than 5% of the total number of sequenced cells. Finally, each cell was summarized with its  
132 first 10 Principal Components (PCs) and projected with UMAP<sup>68</sup> into a two dimensional embedded space.  
133 The number of principal components was chosen as the “elbow” point on the plot of the first 50 PCs. UMAP  
134 projection was performed by using the *uwot* package in the R statistical environment 3.6.

135 **Cell clustering and identification of marker genes:** Transcriptionally similar subpopulations of cells were  
136 found using a Phenograph like approach<sup>69</sup> as implemented in the *clustcells* function of *gfcf* package<sup>65</sup>.  
137 Briefly, we initially built a graph of cells by using the K-Nearest Neighbours (KNN) algorithm applied to the  
138 PC-reduced space where each cell was connected to its 50 most similar cells using the manhattan distance.  
139 Then, to build the final graph of cells, the edge weight between any two cells was computed as the Jaccard  
140 similarity, i.e. the proportion of neighbours they share. The Louvain algorithm with resolution parameter  
141 equal to 0.25 was used to find communities of cells in this graph. Differentially expressed genes in each  
142 cluster were identified by the *findClusterMarkers* function of *gfcf* package, which compares the expression  
143 of a gene in each cluster versus all the other by using the Wilcoxon rank-sum test<sup>65</sup>.

144 **TGCA bulk expression dataset and cell-line deconvolution:** Raw bulk expression data and relative patient  
145 clinical information were collected from the Genomic Data Commons (GDC) portal<sup>70</sup> by using the  
146 *TCGAbiolinks* package<sup>71</sup>. Then, raw counts were normalized using the *EdgeR* package<sup>67</sup> into R statistical  
147 environment 3.6. Bisque tool<sup>50</sup> (available at <https://github.com/cozygene/bisque>) was used to estimate the  
148 cell-line composition from the patient’s bulk gene expression profile. Specifically, we applied the  
149 *ReferenceBasedDecomposition* function with parameters: *bulk.eset* set to the bulk gene expression dataset in  
150 log2 scale; *sc.eset* set to our single-cell BC atlas with normalized raw counts rescaled in log2; *use.overlap*  
151 set to FALSE and *markers* set to the marker genes across the 32 BC cell-lines estimated by using the function  
152 *findClusterMarkers* of *gfcf* package. As in the original manuscript describing the Bisque tool<sup>50</sup>, only marker  
153 genes with an FDR<0.5 and Log2 fold change greater than 0.25 were used for deconvolution purpose.

154 **Spatial sequencing data:** Spatial transcriptomic data of two BC patients were download from 10x Genomic  
155 website (<https://www.10xgenomics.com/resources/datasets>). Only tiles reported to be “in tissue” according  
156 to the related metadata of each patient slide were used.

157 **Mapping new cells into the BC atlas and estimation of the cancer subtype:** New points were mapped to  
158 the UMAP space via *embedNewCells* function of *gfcf* package<sup>65</sup>. Briefly, tiles from 10x spatial  
159 transcriptomics were normalized with *gfcf* package using the ICF weight estimated on the BC atlas. Then  
160 tiles were projected to the existing PC space using gene loadings from the BC atlas. After this transformation,  
161 tiles were mapped to the BC atlas via *umap\_transform* function of *uwot* package. Finally the cancer subtype  
162 of each mapped tile was predicted with the function *classify.cells* of the package *gfcf* with the k nearest-  
163 neighbour parameter set to 7.

164 **Single-cell drug sensitivity prediction:** The naïve gene expression profile (RNA-seq) of about 1,000 cancer  
165 cell line was obtained from the Cancer Cell Line Encyclopaedia (CCLE) portal<sup>72</sup>. Cell lines belonging to  
166 liquid tumour were discarded and only 658 cell lines belonging to solid tumours were retained and used for  
167 further analysis. The raw counts of each gene were normalized with edgeR package<sup>67</sup> and transformed in  
168 log10(CPM+1). Poorly expressed genes and genes whose entropy was in the fifth percentile were excluded  
169 from the analysis. Expression profiles of the 658 CCLs were then crossed with drug sensitivity data<sup>2</sup>. This  
170 dataset was originally composed of 481 small molecules, but, after removing drugs for which the in vitro  
171 response was available for less than 25 CCLs, only 450 small molecules were retained for further analysis.  
172 For each gene and for each of the 450 drugs, we computed the Pearson correlation coefficient (PCC) between  
173 the expression of the gene across the 658 cell lines and the effect of the drug expressed in terms of Area  
174 Under the Curve (AUC). Since the AUC reflects the in vitro response of a cell line to different concentration  
175 of a drug in a timeframe of 72 hours, lower values of AUC are associated with sensitivity whereas higher  
176 values with resistance to the drug. Hence, genes positively correlated with the AUC are potential markers of  
177 resistance (the more expressed the gene, the higher the concentration needed to inhibit growth), vice-versa,  
178 negatively correlated genes are markers of sensitivity. We this approach, we generated a ranked list of  
179 expression-based biomarkers of drug sensitivity and resistance for each of the 450 drugs where genes

180 positively correlated with the AUC are at the top, and those negatively correlated at the bottom. Finally, to  
181 predict drug sensitivity at the single-cell level, we used the top 250 expressed genes of each cell as input of  
182 Gene Set Enrichment Analysis (GSEA) <sup>56</sup> against the ranked list of biomarkers for each one of 450 drugs  
183 built as described above. Hence, while a negative enrichment score implies that genes associated to drug  
184 sensitivity are highly expressed by the cell, a positive one indicates the cell express genes conferring drug  
185 resistance. GSEA and associated p-values were estimating using the *fgsea* package in the R statistical  
186 environment version 3.6.

187 **Drug sensitivity of the HER2+ and HER2- subpopulations in the MDA-MB-361 cell line:** For each  
188 sequenced cell of the MDA-MB-361 cell line, the enrichment score of 450 anticancer drugs was predicted as  
189 described above. Then, to identify drugs exhibiting differential sensitivity for the two subpopulations, we  
190 used the Mann-Whitney test was to assess if there was a difference between the enrichment scores of HER2+  
191 and HER2- subpopulations. P-values were corrected for false discovery rate using Benjamini-Hochberg  
192 correction. A drug was considered specific for HER2- cell population if and only if its FDR was less than  
193 0.05 and the median enrichment score across HER2- cells less than zero while its median enrichment score  
194 across HER2+ cells greater than zero. Conversely, a drug was considered specific for HER2+ cell population  
195 if and only if FDR was less than 0.05 and the median enrichment score across HER2+ cells less than zero  
196 while its median enrichment score across HER2- cells greater than zero.

197 **Validation of drug sensitivity prediction:** Precision of the DREEP method in predicting drug sensitivity  
198 from single cell transcriptional profiles was evaluated using an independent publicly available drug screening  
199 dataset<sup>9</sup> composed by 1,001 CCLs and their maximal inhibitory concentration (IC50) values for 265 small  
200 molecules. Hence, we applied DREEP to the single-cell profiles of the 32 BC cell lines to predict the  
201 percentage of sensitive cells in each cell line for the 86 drugs. The “golden standard” was built by assigning  
202 to each of 32 x 86 (=2,752) cell line/drug pair the value 1 if the cell line was sensitive to the drug and 0  
203 otherwise. To determine if a cell line was sensitive or not to a specific drug from the experimental data, we  
204 converted for each drug its IC50 distribution in Z-scores using all the 1,001 available cell lines and then  
205 defined a cell line sensitive to the drug if and only if its Z-score was in the 5% percentile. Finally, Positive  
206 Predicted Values (PPV) were defined as TP/(TP+FP) where TP represents the number of true positives and  
207 FP the number of false positives predicted cell lines/drug pairs.

208 **Prediction of cell cycle phase from scRNA-seq:** The cell cycle phase of each sequenced cell was predicted  
209 using the function *CellCycleScoring* of the *Seurat* tool with default parameter and following what was  
210 suggested in the corresponding vignette (<https://satijalab.org/seurat>).

211 **HER2 antibody staining procedure for flow cytometry analysis:** Cells were first washed with phosphate-  
212 buffered saline (PBS) 1x, detached with 0.05% trypsin-EDTA, resuspended and harvested with the  
213 appropriate medium in single-cell suspension. Then, cells were counted, washed with PBS-FBS 1%, and  
214 finally incubated for 15 min at 4° in the dark at the concentration of  $1.0 \times 10^6$  cell/ $\mu$ L with staining buffer.  
215 The staining buffer was prepared diluting the mouse anti-human HER2 antibody (BD BB700) at the final  
216 concentration of 0.00114 ng/ $\mu$ L. Then, to remove unbound antibody, cells were washed three times with  
217 PBS-FBS 1%. Flow cytometry measurements were performed on either BD Accuri C6 or BD FACSAria III  
218 instruments. To define antibody positive and negative cells, the unstained samples were used to set the gate.  
219 To record data, at least  $1.0 \times 10^4$  events were collected for each sample. Data analysis was performed using  
220 the either BD FACSDiva 8.0.1 or BD Accuri C6 software.

221  
222 **HER2 expression dynamics experiment:** Sorting of MDA-MB-361 HER2-positive and HER2-negative  
223 cells was performed following the antibody staining procedure described above with the only exception that  
224 before sorting, each sample was resuspended in sorting buffer (PBS 1x, FBS 1%, trypsin 0.1%, EDTA 2mM).  
225 Then,  $4.0 \times 10^5$  cells were collected for each cell subpopulation (*i.e.* HER2-positive and HER2-negative),  
226 plated in their appropriate medium, and incubated at 37°. After 18 days, the percentage of cells expressing  
227 HER2 protein was checked by performing the antibody staining procedure described above.  
228



229 **Drug sensitivity assay:** Cells were seeded in 96-well microplates (PerkinElmer); the seeding cell confluency  
230 was specifically optimized for each cancer cell line to have cells in growth phase at the end of the assay.  
231 After overnight incubation at 37°, cells were treated with DMSO (Merck) for the negative control and with  
232 five concentrations of selected drugs in triplicate. Cells were then incubated at 37° for 72hr. Cell viability  
233 was assessed by measuring either luminescence with GloMax® Discover instrument from Promega or by  
234 nuclei count using the Operetta instrument from PerkinElmer. Luminescence measurements were normalized  
235 using background wells as manufacturer protocol. For luminescence measurement, cells were treated with  
236 Promega CellTiter-Glo® Luminescent Cell Viability Assay according to the manufacturer protocol. For  
237 nuclei count, cells were washed with PBS 1x, fixed with paraformaldehyde (PFA) 4% for 10 min at room  
238 temperature, washed with PBS 1x, incubated at room temperature in the dark with HOECHST 33342  
239 (Thermo Fisher Scientific) diluted 1:1000 in PBS 1x for 10 min and finally washed with PBS 1x. Nuclei  
240 count was performed using Columbus image analysis software (PerkinElmer). All drug used in this study  
241 were purchased from Selleckchem.

#### 242 **Data availability:**

243 Raw sequence data of BC single cell atlas are available on Gene Expression Omnibus  
244 (GEO) repository under the accession number.

245 **Code availability:** The code to reproduce main results in the manuscript is available on  
246 github at the following address [https://github.com/dibbelab/singlecell\\_bcatlas](https://github.com/dibbelab/singlecell_bcatlas). Moreover,  
247 the single cell atlas can be explored at <http://bcatlas.tigem.it>.

248 **Acknowledgments:** This work was supported by the STAR (Sostegno Territoriale alle  
249 Attività di Ricerca) grant of University of Naples Federico II and the AIRC (Associazione  
250 Italiana Ricerca sul Cancro) GRANT MFAG 23162 to GG and by the AIRC (Associazione  
251 Italiana Ricerca sul Cancro) Grant IG 2016-18479 to DB and by iPC project H2020 826121  
252 for both GG and DB.

253 **Author Contribution:** GG performed all computational analysis, conceived the method  
254 for single-cell drug sensitivity prediction and contributed to the writing of the manuscript.  
255 GV implemented the dropseq platform, performed single-cell RNA sequencing and drug  
256 response validations. BT performed cytometric analyses, helped with cell culture and  
257 RNA-seq library preparation. AI and RB contributed to data discussion and writing of the  
258 manuscript. DdB supervised the work, contributed to the writing of the manuscript, and  
259 conceived the original idea.

#### 260 **Conflicts of interest**

261 The Authors declare no conflict of interests.

262  
263  
264  
265  
266  
267  
268

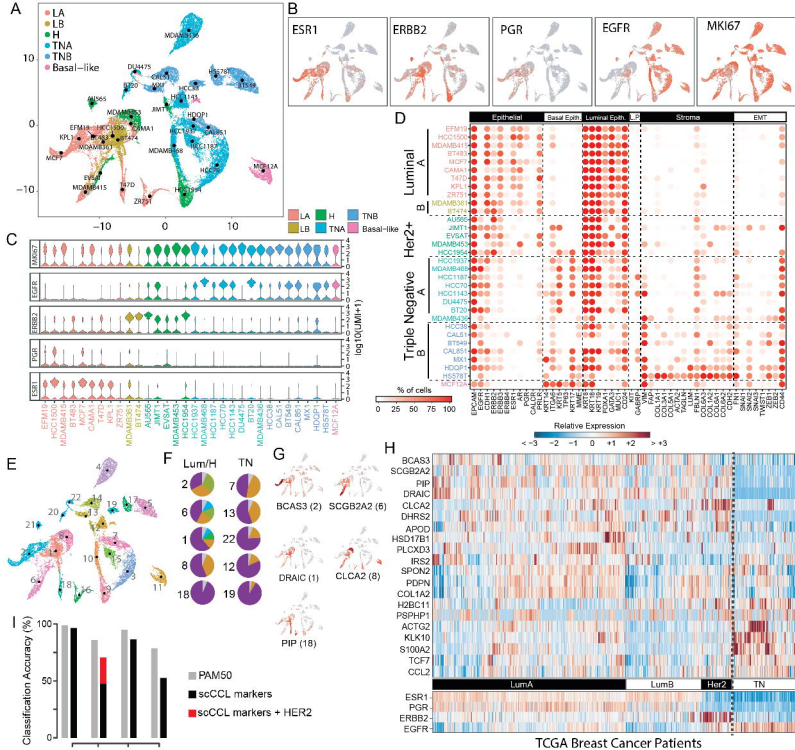

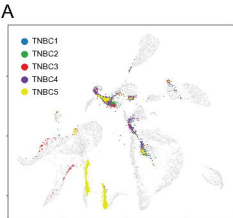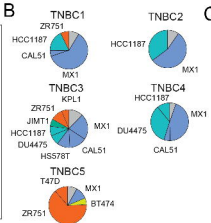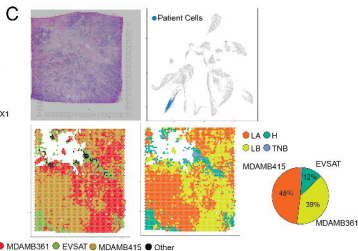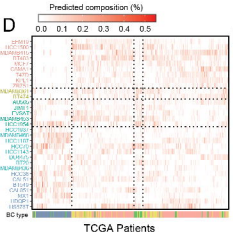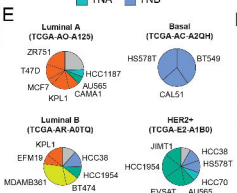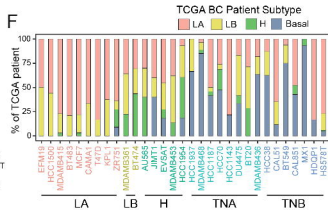

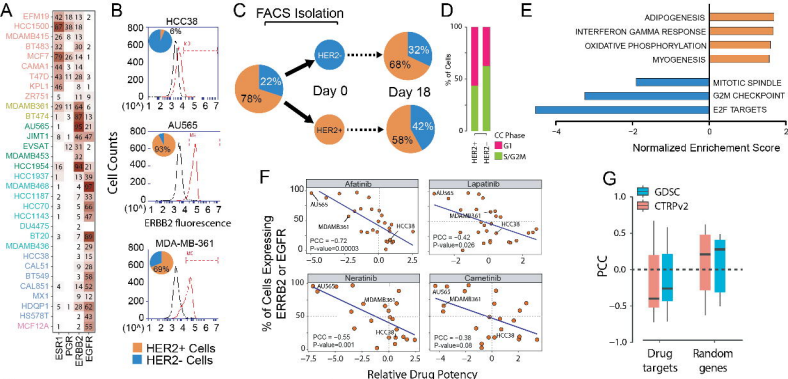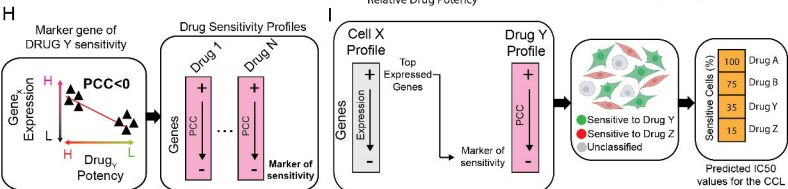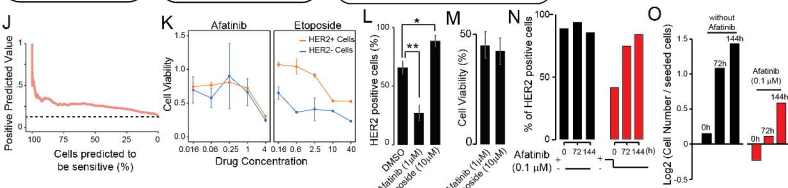

Source: https://www.biorxiv.org/content/10.1101/2021.03.02.433590v4.full.pdf
